# Supplementary material for: Cancer Stemness Associated With Prognosis and the Efficacy of Immunotherapy in Adrenocortical Carcinoma
Source: Front Oncol. 2021 Jul 21;11:651622. doi: 10.3389/fonc.2021.651622 (PMC8334864; doi:10.3389/fonc.2021.651622)
Supplement: Supplementary Table 3 — Multivariate cox analysis of mRNAsi and other clinical characteristics. [file Table_3.xlsx]

## Sheet: table 6
	HR	95%CI_LL	95%CI_HL	p-value
Gender	0.83	0.36	1.9	0.65
Age	1.01	0.98	1.04	0.47
Uicc_stage	0.45	0.03	5.79	0.54
T_category	19.02	1.53	235.81	0.02
N_category	2.27	0.54	9.54	0.26
M_category	1.25	0.43	3.64	0.69
mRNAsi	5223.25	0.25	1.07274e+08	0.09
